# Supplementary material for: Human amplified changes in precipitation-runoff patterns in large river basins of the Midwestern United States
Source: Copernicus journal article supplement (doi:10.5194/hess-2016-571), 2016-11-11
Supplement: Supplementary file [file hess-2016-571-SC1-supplement.pdf]

## References

HESS D, (n.d.). Manuscript preparation guidelines for authors. Retrieved from [http://www.hydrology-and-earth-system-sciences.net/for\\_authors/manuscript\\_preparation.html](http://www.hydrology-and-earth-system-sciences.net/for_authors/manuscript_preparation.html)

Lins, H. F., & Cohn, T. A. (2011). Stationarity: Wanted dead or alive? *Journal of the American Water Resources Association*, 47(3), 475-480. Retrieved from <http://onlinelibrary.wiley.com/doi/10.1111/j.1752-1688.2011.00542.x/full>

Milly, P. C. D., Betancourt, J., Falkenmark, M., Hirsch, R. M., Kundzewicz, Z. W., Lettenmaier, D. P., & Stouffer, R. J. (2008). Stationarity is dead: Whither water management? *Science*, 319(5863), 573-574.

Milly, P. C. D., Betancourt, J., Falkenmark, M., Hirsch, R. M., Kundzewicz, Z. W., Lettenmaier, D. P., Stouffer, R. J., Dettinger, M. D., & Krysanova, V. (2015). On critiques of "Stationarity is dead: Whither water management?" *Water Resources Research*, 51(9), 7785-7789. doi: 10.1002/2015WR017408

Montanari, A., & Koutsoyiannis, D. (2014). Modeling and mitigating natural hazards: Stationarity is immortal! *Water Resources Research*, 50(12), 9748–9756, doi:[10.1002/2014WR016092](https://doi.org/10.1002/2014WR016092).
